# Supplementary material for: Arctic amplification modulated by Atlantic Multidecadal Oscillation and greenhouse forcing on multidecadal to century scales
Source: PubMed Central journal article supplement (PMC8987036; doi:10.1038/s41467-022-29523-x), 2022-04-06
Supplement: 41467_2022_29523_MOESM2_ESM.pdf [file 41467_2022_29523_MOESM2_ESM.pdf]

### **Description of Additional Supplementary Files**

File Name: Supplementary Data 1

Description: It contains the forcings and internal modes of climate system and the millennial AA indices.
